# Supplementary material for: Interaction hub critical for telomerase recruitment and primer-template handling for catalysis
Source: Life Sci Alliance. 2023 Mar 24;6(6):e202201727. doi: 10.26508/lsa.202201727 (PMC10055720; doi:10.26508/lsa.202201727)
Supplement: Supplementary file 8 [file LSA-2022-01727_SdataF5.1.xlsx]

## Sheet: 090817-rolling ball
Name	corrected volume					extract	P+T	hOBDBD	mOBDBD	NOB	L84F	NOBL84F
1,2 extract	1.05257e+06
P+T	544894
h	497803				1and2	1.05257e+06	544894	497803	883868	81102.2	732944	600768
m	883868				3to8	2.56863e+06	1.54611e+06	1.5901e+06	1.845e+06	511960	2.69379e+06	1.66842e+06
NOB	81102.2				9+	2.79313e+06	9.53835e+06	6.2531e+06	3.43507e+06	2.91762e+06	8.24533e+06	7.6534e+06
L84F	732944				total counts	6.41434e+06	1.16293e+07	8.341e+06	6.16394e+06	3.51069e+06	1.16721e+07	9.92259e+06
NOB-L84F	600768
					processivity	0.520936	0.860516	0.797264	0.650572	0.850722	0.753747	0.82102
3-8 extract	2.56863e+06
P+T	1.54611e+06				relative activity	1	1.81302	1.30037	0.960963	0.547319	1.81968	1.54694
h	1.5901e+06
m	1.845e+06
NOB	511960
L84F	2.69379e+06
NOB-L84F	1.66842e+06
9+ extract	2.79313e+06
P+T	9.53835e+06
h	6.2531e+06
m	3.43507e+06
NOB	2.91762e+06
L84F	8.24533e+06
NOB-L84F	7.6534e+06

## Sheet: rolling ball summary
	extract	P+T	hOBDBD	mOBDBD	hNOB	L84F	hNOBL84F
processivity
2017-09-08	0.520936	0.860516	0.797264	0.650572	0.850722	0.753747	0.82102
2017-09-20	0.17721	0.625163	0.674349	0.625347	0.724361	0.724555	0.756948
9-20b	0.440625	0.785665	0.797261	0.669457	0.753894	0.720656	0.773001
mean	0.37959	0.757115	0.756291	0.648459	0.776326	0.732986	0.783656
st dev	0.179807	0.120246	0.0709641	0.0221308	0.0660999	0.0180849	0.0333387
ttest12	0.00860543
ttest23	0.982387
ttest34	0.0690877
ttest45	0.0723013
ttest46	0.0369005
ttest47	0.0199696
ttest37	0.469267
ttest13	0.0281106
ttest14	0.103765
ttest15	0.0342375
ttest16	0.0689408
ttest17	0.0446127
ttest57	0.735786
activity
2017-09-08	1	1.81302	1.30037	0.960963	0.547319	1.81968	1.54694
2017-09-20	1	0.312461	0.743209	0.335374	0.371957	0.56892	0.83922
9-20b	1	1.40481	0.566383	0.283932	0.342919	0.978627	1.14324
mean	1	1.17677	0.869987	0.526756	0.420732	1.12241	1.17647
st dev	0	0.775839	0.383064	0.376913	0.110585	0.637658	0.355027
ttest45	0.562165
ttest46	0.086146
ttest47	0.0262771
ttest34	0.0109685
ttest35	0.10438
ttest36	0.36227
ttest37	0.163573

## Sheet: 092017-rolling ball a
Name	corrected volume					extract	P+T	hOBDBD	mOBDBD	NOB	L84F	NOBL84F
1,2 extract	372984
P+T	40192.5
h	73472.2				1and2	372984	40192.5	73472.2	65975.2	20252.6	44896.1	41123.2
m	65975.2				3to8	503353	100270	214409	99014.7	95379.6	141950	190868
NOB	20252.6				9+	108411	167233	443992	165269	250651	373397	594429
L84F	44896.1				total counts	984747	307696	731873	330259	366284	560242	826420
NOB-L84F	41123.2
					processivity	0.17721	0.625163	0.674349	0.625347	0.724361	0.724555	0.756948
3-8 extract	503353
P+T	100270				relative activity	1	0.312461	0.743209	0.335374	0.371957	0.56892	0.83922
h	214409
m	99014.7
NOB	95379.6
L84F	141950
NOB-L84F	190868
9+ extract	108411
P+T	167233
h	443992
m	165269
NOB	250651
L84F	373397
NOB-L84F	594429

## Sheet: 092017-rolling ball b
Name	corrected volume					extract	P+T	hOBDBD	mOBDBD	NOB	L84F	NOBL84F
1,2 extract	160523
P+T	49240.4
h	5513.94				1and2	160523	49240.4	5513.94	12329.8	4100.6	37597.3	49763.9
m	12329.8				3to8	280150	188579	74823.8	57993.4	54805.2	170293	160335
NOB	4100.6				9+	220677	691255	294240	117455	167884	439326	545987
L84F	37597.3				total counts	661351	929074	374578	187778	226790	647216	756086
NOB-L84F	49763.9
					processivity	0.440625	0.785665	0.797261	0.669457	0.753894	0.720656	0.773001
3-8 extract	280150
P+T	188579				relative activity	1	1.40481	0.566383	0.283932	0.342919	0.978627	1.14324
h	74823.8
m	57993.4
NOB	54805.2
L84F	170293
NOB-L84F	160335
9+ extract	220677
P+T	691255
h	294240
m	117455
NOB	167884
L84F	439326
NOB-L84F	545987
